# Supplementary material
Source: PubMed Central journal article supplement (PMC3722277)
Supplement: NIHMS451578-supplement-01.pdf [file NIHMS451578-supplement-01.pdf]

# **Developmental Disruption of Medial Prefrontal Cortical Gamma-Aminobutyric Acidergic Function by Non-Contingent Cocaine Exposure during Early Adolescence**

## ***Supplemental Information***

### **Supplemental Methods and Materials**

#### **Cytochrome Oxidase Histochemistry and Densitometry**

Rats were deeply anesthetized with 8% chloral hydrate, the brains quickly removed, fixed in a 0.1M phosphate buffer (PB 0.1M) solution containing 4% paraformaldehyde (PFA) for 2 hours and stored in 30% sucrose (in 0.1M PB) for 3 days. Serial coronal sections 50  $\mu$ m thick were collected using a freezing stage (PFS-30MP controller, Physitemp Instruments, Clifton, NJ) on a sliding microtome (HM430, Thermo Scientific Microm, FL). Sections were then mounted on Superfrost Plus slides (VWR, Batavia, IL), dried under the hood for 20 min and incubated for 90 minutes at 37°C in 0.1M PB (pH 7.42) containing 0.50 g/L of 3,3-diaminobenzidine, 0.33 g/L of horse heart cytochrome c, 44 g/L of sucrose and 0.2 g/L of catalase (hydrogen peroxidase oxidoreductase). After incubation (90 min), slides were rinsed, dehydrated and coverslipped. The levels of cytochrome oxidase staining in the frontal cortex (2.7 to 1.2 mm rostral to bregma; (1)) were determined by means of densitometry using a slide scanner (Coolscan V, Nikon, Japan).

#### **Medial Prefrontal Cortex (mPFC) Local Field Potentials Evoked by Ventral Hippocampal Stimulation In Vivo**

Rats were deeply anesthetized with 8% chloral hydrate (400 mg/kg i.p.), placed in a stereotaxic apparatus (ASI instruments, MI), and maintained at 37-38°C (TCAT-2LV controller, Physitemp Instruments, Clifton, NJ). The local anesthetic lidocaine (2% lidocaine hydrochloride with 1:100,000 epinephrine, Cooke-Waite, Atlanta, GA) was applied subcutaneously ~5 min before any skin incision was made. Fifteen minutes after the rat was placed in the stereotaxic frame, a steady supplementary anesthesia level (300-400  $\mu$ L of 8% chloral hydrate per hour) was delivered using a syringe minipump (BASi Baby Bee Syringe Drives, CA) attached to an i.p. cannula (26-gauge butterfly needle). The pattern of cortical electroencephalogram activity was used throughout the recording session to monitor the level of anesthesia as described elsewhere (2). The coordinates for the mPFC recordings were: 3.2 to 2.7 mm anterior from

bregma, 0.8 mm lateral from the midline, 4.2 mm below the brain surface (3). Prefrontal local field potential recordings were conducted using a concentric bipolar electrode (SNE-100x 50 mm; Rhodes Medical Instruments Inc., Summerland, CA), amplified (Cygnus Technology Inc., Delaware Water Gap, PA), filtered (bandwidth 1-100 Hz) and digitized (Digidata 1440A, Molecular Devices, Sunnyvale, CA) at a sampling rate of 10 kHz. A second concentric bipolar electrode (NE-100x 50 mm) was used to stimulate the ventral hippocampus (5.8 mm posterior from bregma, 5.2 mm lateral from the midline, 4.5 mm below the brain surface) (3). Ventral hippocampal stimulation was driven by a computer-controlled pulse generator Master 8 Stimulator (AMPI, Jerusalem, Israel).

All recordings were conducted following a previously reported protocol (3). Briefly, single and trains of square pulses of 300  $\mu$ s duration were delivered every 15 s, typically at 0.75 mA stimulating intensity. For each set of train stimulation, 10 pulses of evoked field potential responses were delivered at 10, 20 and 40 Hz. These frequencies were chosen because they are suitable for assessing changes in mPFC network responses resulting from a developmental disruption of local GABAergic transmission (3). The pattern of the evoked response at a given frequency was estimated by averaging the amplitude (from the onset to the peak amplitude) of each of the evoked field potentials obtained from 10-15 sweeps of train stimulation and normalized to the first evoked response. Finally, changes in prefrontal local field potential responses following ventral hippocampal high-frequency stimulation (50 pulses at 100 Hz/15 s x 4) were examined to determine whether a history of early adolescent cocaine exposure is sufficient to alter plasticity within the hippocampal-mPFC pathway. It is well known that changes in synaptic plasticity within the ventral hippocampal-prefrontal pathway can be assessed *in vivo* by means of local field potentials (4).

### **Histological Confirmation of the Electrode Placements**

Rats were anesthetized with 8% chloral hydrate (in 0.9% NaCl), transcardially perfused with cold saline (150 ml) followed by 200 ml of 4% PFA in PB 0.1M. The brains were quickly removed and fixed in 4% PFA for 24 hours before they were stored in 30% sucrose (in 0.1M PB). Coronal sections 50  $\mu$ m thick were obtained from the mPFC and the ventral hippocampus. Sections were first mounted on Superfrost Plus slides (VWR, Batavia, IL) and treated with formol ethanol, before undergoing dehydration, treatment with xylene, rehydration, and staining with Cresyl violet. Slides were then washed and dehydrated, coverslipped with Permount (Fisher Scientific, Pittsburgh, PA), and examined under the microscope.

**Table S1.** Cytochrome Oxidase I (CO-I) histochemistry

**CO-I histochemistry (ROD)**

| <b>B: 2.7</b>            | <b>IL/PL</b>    | <b>OFC</b>      | <b>CG</b>       | <b>MC</b>       | <b>SS</b>       |
|--------------------------|-----------------|-----------------|-----------------|-----------------|-----------------|
| early adolescent saline  | 0.296 +/- 0.008 | 0.302 +/- 0.008 | 0.295 +/- 0.006 | 0.299 +/- 0.007 | 0.305 +/- 0.005 |
| early adolescent cocaine | 0.357 +/- 0.008 | 0.343 +/- 0.009 | 0.323 +/- 0.013 | 0.331 +/- 0.010 | 0.337 +/- 0.010 |
| adult saline             | 0.294 +/- 0.005 | 0.290 +/- 0.009 | 0.304 +/- 0.006 | 0.301 +/- 0.004 | 0.312 +/- 0.005 |
| adult cocaine            | 0.275 +/- 0.008 | 0.258 +/- 0.007 | 0.280 +/- 0.013 | 0.257 +/- 0.011 | 0.274 +/- 0.013 |

  

| <b>B: 1.7</b>            | <b>CG</b>       | <b>MC</b>       | <b>SS</b>       |
|--------------------------|-----------------|-----------------|-----------------|
| early adolescent saline  | 0.349 +/- 0.011 | 0.339 +/- 0.011 | 0.340 +/- 0.010 |
| early adolescent cocaine | 0.353 +/- 0.013 | 0.329 +/- 0.010 | 0.334 +/- 0.010 |
| adult saline             | 0.358 +/- 0.006 | 0.340 +/- 0.007 | 0.338 +/- 0.004 |
| adult cocaine            | 0.337 +/- 0.015 | 0.309 +/- 0.016 | 0.322 +/- 0.020 |

  

| <b>B: 1.2</b>            | <b>CG</b>       | <b>MC</b>       | <b>SS</b>       |
|--------------------------|-----------------|-----------------|-----------------|
| early adolescent saline  | 0.370 +/- 0.009 | 0.345 +/- 0.010 | 0.341 +/- 0.011 |
| early adolescent cocaine | 0.370 +/- 0.013 | 0.342 +/- 0.011 | 0.325 +/- 0.008 |
| adult saline             | 0.365 +/- 0.007 | 0.350 +/- 0.008 | 0.342 +/- 0.009 |
| adult cocaine            | 0.331 +/- 0.014 | 0.299 +/- 0.015 | 0.304 +/- 0.016 |

Changes in CO-I staining (ROD: relative optical density) in early adolescent saline: 10 (rats); early adolescent cocaine: 12; adult saline: 8; adult cocaine: 12.

B, bregma; CG, cingulate cortex; IL, infralimbic; MC, motor cortex; OFC, orbitofrontal cortex; PL, prelimbic; SS, somatosensory cortex.

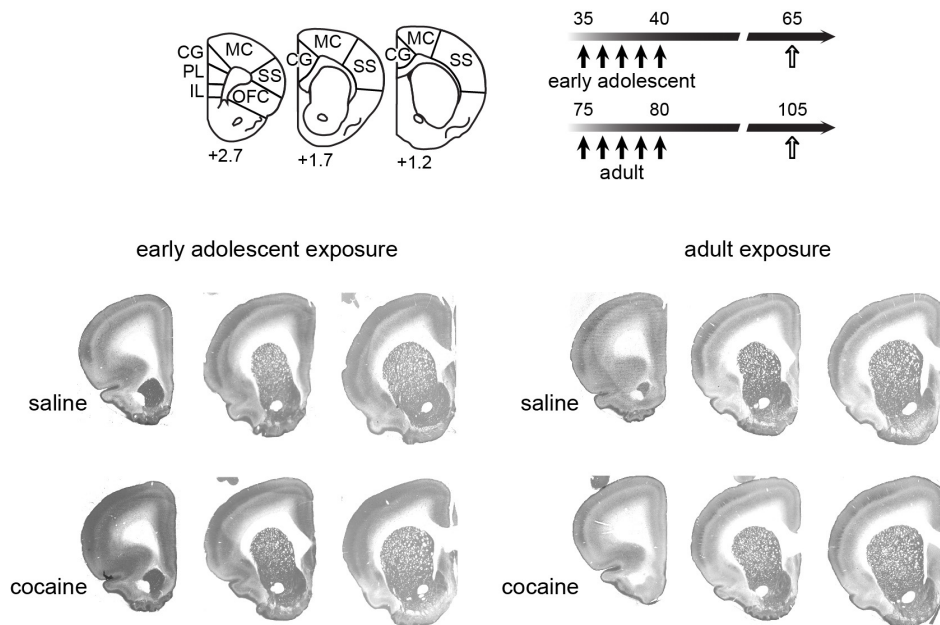

**Figure S1.** Representative coronal sections of CO-I staining. See Table S1, above, for abbreviations.

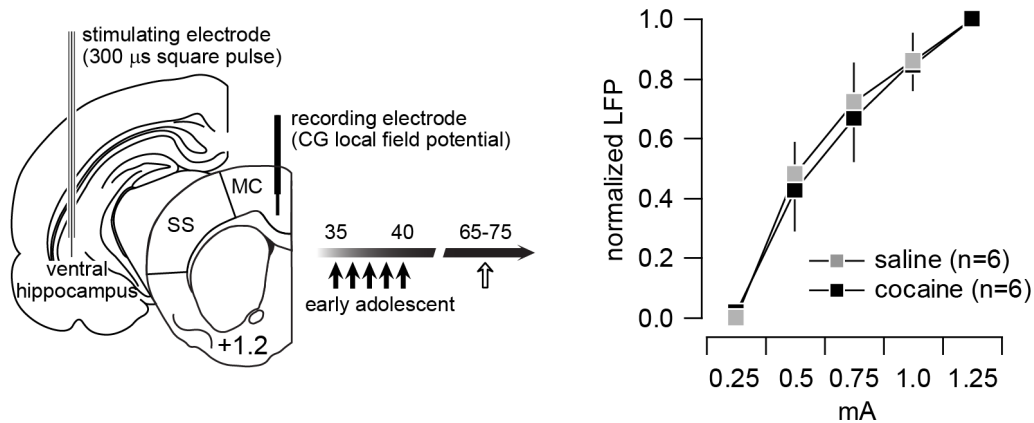

**Figure S2.** Saline- and cocaine-treated animals exhibited similar pattern of ventral hippocampal-evoked local field potential (LFP) responses in the cingulate cortex (CG; bregma 1.2), a cortical region where the cytochrome oxidase staining remained unchanged following early adolescent cocaine exposure. MC, motor cortex; SS, somatosensory cortex.

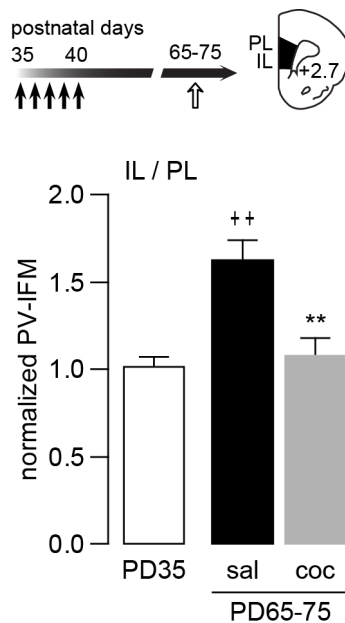

**Figure S3.** Developmental disruption of parvalbumin (PV) immunoreactivity in the medial prefrontal cortex (PFC; IL, infralimbic; PL, prelimbic) by early adolescent exposure to cocaine (from postnatal days -PD- 35 to 40). Analysis of PV immunoreactivity in the medial PFC by mean fluorescent intensity (IFM). Here, a gray matter region control (i.e., layer I) was used to correct the background signal instead of the white matter (Figure 9). Similar to the results obtained using the white matter as control, we found that relative to the PD35 age group ( $n = 9$ ), a significant increase in PV immunoreactivity can be detected in the adult medial PFC of saline (sal) treated rats ( $n = 6$ ). In contrast, PV immunoreactivity in the early adolescent cocaine-exposed group (coc,  $n = 8$ ) resembles that observed in the juvenile medial PFC (\*\* $p < .005$  vs. saline; ++ $p < .005$  vs. PD35, Tukey post-hoc test after significant analysis of variance).

## Supplemental References

1. Paxinos G, Watson C (1997): *The Rat Brain in Stereotaxic Coordinates, Compact 3rd ed.* San Diego, CA: Academic Press.
2. Tseng KY, Kasanetz F, Kargieman L, Riquelme LA, Murer MG (2001): Cortical slow oscillatory activity is reflected in the membrane potential and spike trains of striatal neurons in rats with chronic nigrostriatal lesions. *J Neurosci* 21:6430-6439.
3. Thomases DR, Cass DK, Tseng KY (2013): Periadolescent exposure to the NMDA receptor antagonist MK-801 impairs the functional maturation of local GABAergic circuits in the adult prefrontal cortex. *J Neurosci* 33:26-34.
4. Gurden H, Takita M, Jay TM (2000): Essential role of D1 but not D2 receptors in the NMDA receptor-dependent long-term potentiation at hippocampal-prefrontal cortex synapses in vivo. *J Neurosci* 20:RC106.
